# Supplementary material
Source: PubMed Central journal article supplement (PMC10471317)
Supplement: NIHMS1922197-supplement-Suppl_Data_files.pdf [file NIHMS1922197-supplement-Suppl_Data_files.pdf]

## ICMJE DISCLOSURE FORM

Date: 7/19/2021  
 Your Name: Patricia P. Bloom MD  
 Manuscript Title: Microbiome Therapeutics for Hepatic Encephalopathy  
 Manuscript number (if known): JHEPAT-D-21-01057

In the interest of transparency, we ask you to disclose all relationships/activities/interests listed below that are related to the content of your manuscript. "Related" means any relation with for-profit or not-for-profit third parties whose interests may be affected by the content of the manuscript. Disclosure represents a commitment to transparency and does not necessarily indicate a bias. If you are in doubt about whether to list a relationship/activity/interest, it is preferable that you do so.

The following questions apply to the author's relationships/activities/interests as they relate to the **current manuscript only**.

The author's relationships/activities/interests should be **defined broadly**. For example, if your manuscript pertains to the epidemiology of hypertension, you should declare all relationships with manufacturers of antihypertensive medication, even if that medication is not mentioned in the manuscript.

In item #1 below, report all support for the work reported in this manuscript without time limit. For all other items, the time frame for disclosure is the past 36 months.

|                                                           |                                                                                                                                                                                | Name all entities with whom you have this relationship or indicate none (add rows as needed)                     | Specifications/Comments (e.g., if payments were made to you or to your institution) |
|-----------------------------------------------------------|--------------------------------------------------------------------------------------------------------------------------------------------------------------------------------|------------------------------------------------------------------------------------------------------------------|-------------------------------------------------------------------------------------|
| <b>Time frame: Since the initial planning of the work</b> |                                                                                                                                                                                |                                                                                                                  |                                                                                     |
| 1                                                         | All support for the present manuscript (e.g., funding, provision of study materials, medical writing, article processing charges, etc.)<br><b>No time limit for this item.</b> | ___ None                                                                                                         |                                                                                     |
|                                                           |                                                                                                                                                                                |                                                                                                                  |                                                                                     |
|                                                           |                                                                                                                                                                                |                                                                                                                  |                                                                                     |
|                                                           |                                                                                                                                                                                |                                                                                                                  |                                                                                     |
|                                                           |                                                                                                                                                                                |                                                                                                                  |                                                                                     |
|                                                           |                                                                                                                                                                                |                                                                                                                  |                                                                                     |
|                                                           |                                                                                                                                                                                |                                                                                                                  |                                                                                     |
| <b>Time frame: past 36 months</b>                         |                                                                                                                                                                                |                                                                                                                  |                                                                                     |
| 2                                                         | Grants or contracts from any entity (if not indicated in item #1 above).                                                                                                       | Patricia Bloom receives funding from the American College of Gastroenterology (ACG Junior Faculty Award) and the |                                                                                     |

|   |                                                                                                              |                                                                                                                 |  |
|---|--------------------------------------------------------------------------------------------------------------|-----------------------------------------------------------------------------------------------------------------|--|
|   |                                                                                                              | American Association for the Study of Liver Diseases (AASLD Advanced Hepatology Award).                         |  |
|   |                                                                                                              | VBY was funded by NIH Award AI124255.                                                                           |  |
|   |                                                                                                              | EBT is funded by NIDDK K23 DK117055.                                                                            |  |
| 3 | Royalties or licenses                                                                                        | ___ None                                                                                                        |  |
|   |                                                                                                              |                                                                                                                 |  |
|   |                                                                                                              |                                                                                                                 |  |
| 4 | Consulting fees                                                                                              | Patricia Bloom serves as a consultant for Synlogic.                                                             |  |
|   |                                                                                                              | VBY serves as a consultant to Vedanta, Bio-K+ International and Pantheryx.                                      |  |
|   |                                                                                                              | Elliot Tapper has served as consultant for Axcella, Kaleido, Mallinckrodt, Novo Nordisk, Allergan, and Takeida. |  |
| 5 | Payment or honoraria for lectures, presentations, speakers bureaus, manuscript writing or educational events | ___ None                                                                                                        |  |
|   |                                                                                                              |                                                                                                                 |  |
|   |                                                                                                              |                                                                                                                 |  |
| 6 | Payment for expert testimony                                                                                 | ___ None                                                                                                        |  |
|   |                                                                                                              |                                                                                                                 |  |
|   |                                                                                                              |                                                                                                                 |  |
| 7 | Support for attending meetings and/or travel                                                                 | ___ None                                                                                                        |  |
|   |                                                                                                              |                                                                                                                 |  |
|   |                                                                                                              |                                                                                                                 |  |
| 8 | Patents planned, issued or pending                                                                           | ___ None                                                                                                        |  |

|    |                                                                                                   |                               |  |
|----|---------------------------------------------------------------------------------------------------|-------------------------------|--|
|    |                                                                                                   |                               |  |
| 9  | Participation on a Data Safety Monitoring Board or Advisory Board                                 | <input type="checkbox"/> None |  |
|    |                                                                                                   |                               |  |
| 10 | Leadership or fiduciary role in other board, society, committee or advocacy group, paid or unpaid | <input type="checkbox"/> None |  |
|    |                                                                                                   |                               |  |
| 11 | Stock or stock options                                                                            | <input type="checkbox"/> None |  |
|    |                                                                                                   |                               |  |
| 12 | Receipt of equipment, materials, drugs, medical writing, gifts or other services                  | <input type="checkbox"/> None |  |
|    |                                                                                                   |                               |  |
| 13 | Other financial or non-financial interests                                                        | <input type="checkbox"/> None |  |
|    |                                                                                                   |                               |  |

Please place an "X" next to the following statement to indicate your agreement:

I certify that I have answered every question and have not altered the wording of any of the questions on this form.

## ICMJE DISCLOSURE FORM

Date: 8/19/2021  
 Your Name: Anna Lok MD  
 Manuscript Title: Microbiome Therapeutics for Hepatic Encephalopathy  
 Manuscript number (if known): JHEPAT-D-21-01057

In the interest of transparency, we ask you to disclose all relationships/activities/interests listed below that are related to the content of your manuscript. "Related" means any relation with for-profit or not-for-profit third parties whose interests may be affected by the content of the manuscript. Disclosure represents a commitment to transparency and does not necessarily indicate a bias. If you are in doubt about whether to list a relationship/activity/interest, it is preferable that you do so.

The following questions apply to the author's relationships/activities/interests as they relate to the current manuscript only.

The author's relationships/activities/interests should be defined broadly. For example, if your manuscript pertains to the epidemiology of hypertension, you should declare all relationships with manufacturers of antihypertensive medication, even if that medication is not mentioned in the manuscript.

In item #1 below, report all support for the work reported in this manuscript without time limit. For all other items, the time frame for disclosure is the past 36 months.

|                                                           |                                                                                                                                                                                | Name all entities with whom you have this relationship or indicate none (add rows as needed) | Specifications/Comments (e.g., if payments were made to you or to your institution) |
|-----------------------------------------------------------|--------------------------------------------------------------------------------------------------------------------------------------------------------------------------------|----------------------------------------------------------------------------------------------|-------------------------------------------------------------------------------------|
| <b>Time frame: Since the initial planning of the work</b> |                                                                                                                                                                                |                                                                                              |                                                                                     |
| 1                                                         | All support for the present manuscript (e.g., funding, provision of study materials, medical writing, article processing charges, etc.)<br><b>No time limit for this item.</b> | ___ None                                                                                     |                                                                                     |
|                                                           |                                                                                                                                                                                |                                                                                              |                                                                                     |
|                                                           |                                                                                                                                                                                |                                                                                              |                                                                                     |
|                                                           |                                                                                                                                                                                |                                                                                              |                                                                                     |
|                                                           |                                                                                                                                                                                |                                                                                              |                                                                                     |
|                                                           |                                                                                                                                                                                |                                                                                              |                                                                                     |
|                                                           |                                                                                                                                                                                |                                                                                              |                                                                                     |
| <b>Time frame: past 36 months</b>                         |                                                                                                                                                                                |                                                                                              |                                                                                     |
| 2                                                         | Grants or contracts from any entity (if not indicated in item #1 above).                                                                                                       | None                                                                                         |                                                                                     |
|                                                           |                                                                                                                                                                                |                                                                                              |                                                                                     |
| 3                                                         | Royalties or licenses                                                                                                                                                          | ___ None                                                                                     |                                                                                     |
|                                                           |                                                                                                                                                                                |                                                                                              |                                                                                     |
| 4                                                         | Consulting fees                                                                                                                                                                | None                                                                                         |                                                                                     |

|    |                                                                                                              |          |  |
|----|--------------------------------------------------------------------------------------------------------------|----------|--|
|    |                                                                                                              |          |  |
| 5  | Payment or honoraria for lectures, presentations, speakers bureaus, manuscript writing or educational events | ___ None |  |
| 6  | Payment for expert testimony                                                                                 | ___ None |  |
| 7  | Support for attending meetings and/or travel                                                                 | ___ None |  |
| 8  | Patents planned, issued or pending                                                                           | ___ None |  |
| 9  | Participation on a Data Safety Monitoring Board or Advisory Board                                            | ___ None |  |
| 10 | Leadership or fiduciary role in other board, society, committee or advocacy group, paid or unpaid            | ___ None |  |
| 11 | Stock or stock options                                                                                       | ___ None |  |
| 12 | Receipt of equipment, materials, drugs, medical writing, gifts or other services                             | ___ None |  |
| 13 | Other financial or non-financial interests                                                                   | ___ None |  |

Please place an "X" next to the following statement to indicate your agreement:

I certify that I have answered every question and have not altered the wording of any of the questions on this form.

## ICMJE DISCLOSURE FORM

Date: 8/19/2021  
 Your Name: Elliot Tapper MD  
 Manuscript Title: Microbiome Therapeutics for Hepatic Encephalopathy  
 Manuscript number (if known): JHEPAT-D-21-01057

In the interest of transparency, we ask you to disclose all relationships/activities/interests listed below that are related to the content of your manuscript. "Related" means any relation with for-profit or not-for-profit third parties whose interests may be affected by the content of the manuscript. Disclosure represents a commitment to transparency and does not necessarily indicate a bias. If you are in doubt about whether to list a relationship/activity/interest, it is preferable that you do so.

The following questions apply to the author's relationships/activities/interests as they relate to the current manuscript only.

The author's relationships/activities/interests should be defined broadly. For example, if your manuscript pertains to the epidemiology of hypertension, you should declare all relationships with manufacturers of antihypertensive medication, even if that medication is not mentioned in the manuscript.

In item #1 below, report all support for the work reported in this manuscript without time limit. For all other items, the time frame for disclosure is the past 36 months.

|                                                           |                                                                                                                                                                                | Name all entities with whom you have this relationship or indicate none (add rows as needed) | Specifications/Comments (e.g., if payments were made to you or to your institution) |
|-----------------------------------------------------------|--------------------------------------------------------------------------------------------------------------------------------------------------------------------------------|----------------------------------------------------------------------------------------------|-------------------------------------------------------------------------------------|
| <b>Time frame: Since the initial planning of the work</b> |                                                                                                                                                                                |                                                                                              |                                                                                     |
| 1                                                         | All support for the present manuscript (e.g., funding, provision of study materials, medical writing, article processing charges, etc.)<br><b>No time limit for this item.</b> | ___ None                                                                                     |                                                                                     |
|                                                           |                                                                                                                                                                                |                                                                                              |                                                                                     |
|                                                           |                                                                                                                                                                                |                                                                                              |                                                                                     |
|                                                           |                                                                                                                                                                                |                                                                                              |                                                                                     |
|                                                           |                                                                                                                                                                                |                                                                                              |                                                                                     |
|                                                           |                                                                                                                                                                                |                                                                                              |                                                                                     |
|                                                           |                                                                                                                                                                                |                                                                                              |                                                                                     |
| <b>Time frame: past 36 months</b>                         |                                                                                                                                                                                |                                                                                              |                                                                                     |
| 2                                                         | Grants or contracts from any entity (if not indicated in item #1 above).                                                                                                       |                                                                                              |                                                                                     |
|                                                           |                                                                                                                                                                                | Funded by NIDDK K23 DK117055.                                                                |                                                                                     |
| 3                                                         | Royalties or licenses                                                                                                                                                          | ___ None                                                                                     |                                                                                     |
|                                                           |                                                                                                                                                                                |                                                                                              |                                                                                     |
|                                                           |                                                                                                                                                                                |                                                                                              |                                                                                     |

|    |                                                                                                              |                                                                                                                 |  |
|----|--------------------------------------------------------------------------------------------------------------|-----------------------------------------------------------------------------------------------------------------|--|
| 4  | Consulting fees                                                                                              |                                                                                                                 |  |
|    |                                                                                                              |                                                                                                                 |  |
|    |                                                                                                              | Elliot Tapper has served as consultant for Axcella, Kaleido, Mallinckrodt, Novo Nordisk, Allergan, and Takeida. |  |
| 5  | Payment or honoraria for lectures, presentations, speakers bureaus, manuscript writing or educational events | ___ None                                                                                                        |  |
|    |                                                                                                              |                                                                                                                 |  |
|    |                                                                                                              |                                                                                                                 |  |
| 6  | Payment for expert testimony                                                                                 | ___ None                                                                                                        |  |
|    |                                                                                                              |                                                                                                                 |  |
|    |                                                                                                              |                                                                                                                 |  |
| 7  | Support for attending meetings and/or travel                                                                 | ___ None                                                                                                        |  |
|    |                                                                                                              |                                                                                                                 |  |
|    |                                                                                                              |                                                                                                                 |  |
| 8  | Patents planned, issued or pending                                                                           | ___ None                                                                                                        |  |
|    |                                                                                                              |                                                                                                                 |  |
|    |                                                                                                              |                                                                                                                 |  |
| 9  | Participation on a Data Safety Monitoring Board or Advisory Board                                            | ___ None                                                                                                        |  |
|    |                                                                                                              |                                                                                                                 |  |
|    |                                                                                                              |                                                                                                                 |  |
| 10 | Leadership or fiduciary role in other board, society, committee or advocacy group, paid or unpaid            | ___ None                                                                                                        |  |
|    |                                                                                                              |                                                                                                                 |  |
|    |                                                                                                              |                                                                                                                 |  |
| 11 | Stock or stock options                                                                                       | ___ None                                                                                                        |  |
|    |                                                                                                              |                                                                                                                 |  |
|    |                                                                                                              |                                                                                                                 |  |
| 12 | Receipt of equipment, materials, drugs, medical writing, gifts or other services                             | ___ None                                                                                                        |  |
|    |                                                                                                              |                                                                                                                 |  |
|    |                                                                                                              |                                                                                                                 |  |
| 13 | Other financial or non-financial interests                                                                   | ___ None                                                                                                        |  |
|    |                                                                                                              |                                                                                                                 |  |
|    |                                                                                                              |                                                                                                                 |  |

Please place an "X" next to the following statement to indicate your agreement:

I certify that I have answered every question and have not altered the wording of any of the questions on this form.



## ICMJE DISCLOSURE FORM

Date: 8/19/2021  
 Your Name: Vincent Young MD PhD  
 Manuscript Title: Microbiome Therapeutics for Hepatic Encephalopathy  
 Manuscript number (if known): JHEPAT-D-21-01057

In the interest of transparency, we ask you to disclose all relationships/activities/interests listed below that are related to the content of your manuscript. "Related" means any relation with for-profit or not-for-profit third parties whose interests may be affected by the content of the manuscript. Disclosure represents a commitment to transparency and does not necessarily indicate a bias. If you are in doubt about whether to list a relationship/activity/interest, it is preferable that you do so.

The following questions apply to the author's relationships/activities/interests as they relate to the current manuscript only.

The author's relationships/activities/interests should be defined broadly. For example, if your manuscript pertains to the epidemiology of hypertension, you should declare all relationships with manufacturers of antihypertensive medication, even if that medication is not mentioned in the manuscript.

In item #1 below, report all support for the work reported in this manuscript without time limit. For all other items, the time frame for disclosure is the past 36 months.

|                                                           |                                                                                                                                                                                | Name all entities with whom you have this relationship or indicate none (add rows as needed) | Specifications/Comments (e.g., if payments were made to you or to your institution) |
|-----------------------------------------------------------|--------------------------------------------------------------------------------------------------------------------------------------------------------------------------------|----------------------------------------------------------------------------------------------|-------------------------------------------------------------------------------------|
| <b>Time frame: Since the initial planning of the work</b> |                                                                                                                                                                                |                                                                                              |                                                                                     |
| 1                                                         | All support for the present manuscript (e.g., funding, provision of study materials, medical writing, article processing charges, etc.)<br><b>No time limit for this item.</b> | ___ None                                                                                     |                                                                                     |
|                                                           |                                                                                                                                                                                |                                                                                              |                                                                                     |
|                                                           |                                                                                                                                                                                |                                                                                              |                                                                                     |
|                                                           |                                                                                                                                                                                |                                                                                              |                                                                                     |
|                                                           |                                                                                                                                                                                |                                                                                              |                                                                                     |
|                                                           |                                                                                                                                                                                |                                                                                              |                                                                                     |
|                                                           |                                                                                                                                                                                |                                                                                              |                                                                                     |
| <b>Time frame: past 36 months</b>                         |                                                                                                                                                                                |                                                                                              |                                                                                     |
| 2                                                         | Grants or contracts from any entity (if not indicated in item #1 above).                                                                                                       |                                                                                              |                                                                                     |
|                                                           |                                                                                                                                                                                | Funded by NIH Award AI124255.                                                                |                                                                                     |
| 3                                                         | Royalties or licenses                                                                                                                                                          | ___ None                                                                                     |                                                                                     |
|                                                           |                                                                                                                                                                                |                                                                                              |                                                                                     |
|                                                           |                                                                                                                                                                                |                                                                                              |                                                                                     |

|    |                                                                                                              |                                                                       |  |
|----|--------------------------------------------------------------------------------------------------------------|-----------------------------------------------------------------------|--|
| 4  | Consulting fees                                                                                              |                                                                       |  |
|    |                                                                                                              | Serve as a consultant to Vedanta, Bio-K+ International and Pantheryx. |  |
|    |                                                                                                              |                                                                       |  |
| 5  | Payment or honoraria for lectures, presentations, speakers bureaus, manuscript writing or educational events | ___ None                                                              |  |
|    |                                                                                                              |                                                                       |  |
|    |                                                                                                              |                                                                       |  |
| 6  | Payment for expert testimony                                                                                 | ___ None                                                              |  |
|    |                                                                                                              |                                                                       |  |
|    |                                                                                                              |                                                                       |  |
| 7  | Support for attending meetings and/or travel                                                                 | ___ None                                                              |  |
|    |                                                                                                              |                                                                       |  |
|    |                                                                                                              |                                                                       |  |
| 8  | Patents planned, issued or pending                                                                           | ___ None                                                              |  |
|    |                                                                                                              |                                                                       |  |
|    |                                                                                                              |                                                                       |  |
| 9  | Participation on a Data Safety Monitoring Board or Advisory Board                                            | ___ None                                                              |  |
|    |                                                                                                              |                                                                       |  |
|    |                                                                                                              |                                                                       |  |
| 10 | Leadership or fiduciary role in other board, society, committee or advocacy group, paid or unpaid            | ___ None                                                              |  |
|    |                                                                                                              |                                                                       |  |
|    |                                                                                                              |                                                                       |  |
| 11 | Stock or stock options                                                                                       | ___ None                                                              |  |
|    |                                                                                                              |                                                                       |  |
|    |                                                                                                              |                                                                       |  |
| 12 | Receipt of equipment, materials, drugs, medical writing, gifts or other services                             | ___ None                                                              |  |
|    |                                                                                                              |                                                                       |  |
|    |                                                                                                              |                                                                       |  |
| 13 | Other financial or non-financial interests                                                                   | ___ None                                                              |  |
|    |                                                                                                              |                                                                       |  |
|    |                                                                                                              |                                                                       |  |

Please place an "X" next to the following statement to indicate your agreement:

  X   I certify that I have answered every question and have not altered the wording of any of the questions on this

form.
